# Supplementary material for: Sensitivity of lysozyme crystallization to temperature variation
Source: Royal Society of Chemistry journal article supplement (doi:10.1039/c6ce00060f), 2016-01-01
Supplement: c6ce00060f1.pdf [file c6ce00060f1.pdf]

**Supplementary Material for**

# **Sensitivity of lysozyme crystallization to temperature variation**

*Yong-Ming Liu<sup>a</sup>, Hai-Sheng Li<sup>a</sup>, Zi-Qing Wu<sup>a</sup>, Rui-Qing Chen<sup>a,b</sup>, Qin-Qin Lu<sup>a</sup>, Yun-Zhu Guo<sup>a</sup>,  
Chen-Yan Zhang<sup>a</sup>, Da-Chuan Yin<sup>a\*</sup>*

a. Key Laboratory for Space Bioscience and Biotechnology, School of Life Sciences,

Northwestern Polytechnical University, Xi'an 710072, Shaanxi, PR China

b. School of Mechanics Civil Engineering and Architecture, Northwestern Polytechnical University,  
Xi'an 710129, Shaanxi, PR China.

**This word file includes:**

Figs. S1 to S4 and Table S1

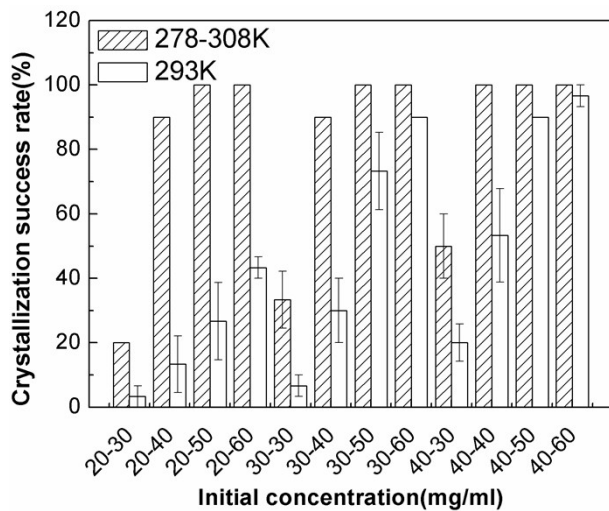

(a)

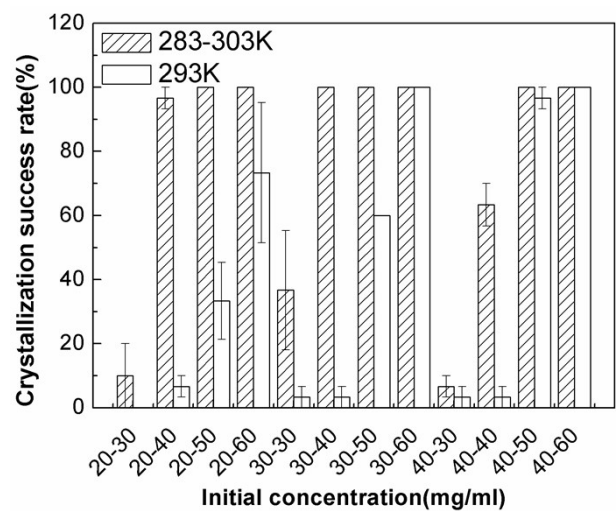

(b)

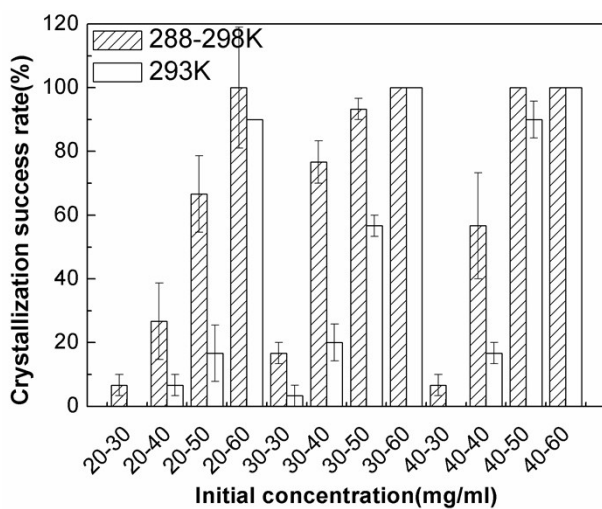

(c)

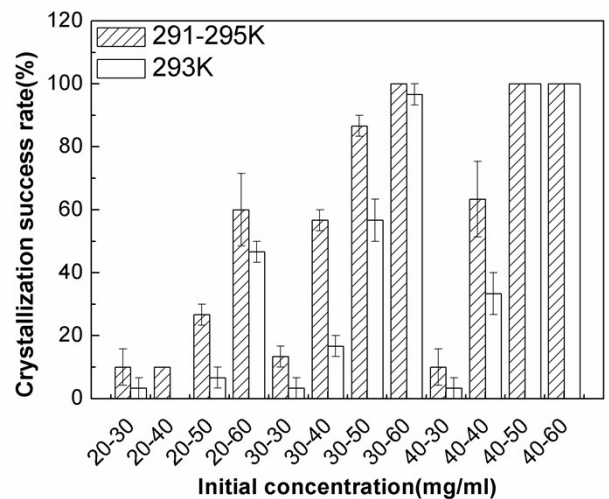

(d)

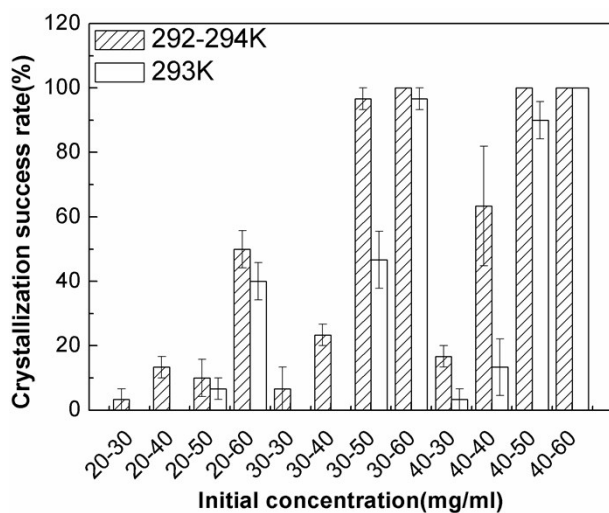

(e)

**Fig. S1.** The crystallization success rate of lysozyme at varying temperature and the constant temperature. (a)

Varying temperature: 278-308 K, constant temperature: 293 K; (b) Varying temperature: 283-303 K, constant temperature: 293 K; (c) Varying temperature: 288-298K, Constant temperature: 293 K; (d) Varying temperature: 291-295 K, constant temperature: 293 K; (e) Varying temperature: 292-294 K, constant temperature: 293 K. 20-30: initial concentration of 20 mg/mL for lysozyme and 30 mg/mL for NaCl; 20-40: initial concentration of 20 mg/mL for lysozyme and 40 mg/mL for NaCl; 20-50: initial concentration of 20 mg/mL for lysozyme and 50 mg/mL for NaCl; 20-60: initial concentration of 20 mg/mL for lysozyme and 60 mg/mL for NaCl; 30-30: initial concentration of 30mg/mL for lysozyme and 30 mg/mL for NaCl; 30-40: initial concentration of 30 mg/mL for lysozyme and 40 mg/mL for NaCl; 30-50: initial concentration of 30 mg/mL for lysozyme and 50 mg/mL for NaCl; 30-60: initial concentration of 30 mg/mL for lysozyme and 60 mg/mL for NaCl; 40-30: initial concentration of 40 mg/mL for lysozyme and 30 mg/mL for NaCl; 40-40: initial concentration of 40 mg/mL for lysozyme and 40 mg/mL for NaCl; 40-50: initial concentration of 40 mg/mL for lysozyme and 50 mg/mL for NaCl; 40-60: initial concentration of 40 mg/mL for lysozyme and 60 mg/mL for NaCl.

**Table S1** The comparison of  $\Delta S$  against  $\Delta T$  ( $\Delta T = 10$  K) at two different centered temperatures of 283 K and 293 K.  $\Delta S$  means the difference in crystallization success rate between crystallization experiments at varying temperatures and a constant temperature.

| Initial concentration        | $\Delta S$ |        |
|------------------------------|------------|--------|
|                              | 283 K      | 293 K  |
| 20 mg/mL HEWL, 30 mg/mL NaCl | 25%        | 6.67%  |
| 20 mg/mL HEWL, 40 mg/mL NaCl | -5%        | 20%    |
| 20 mg/mL HEWL, 50 mg/mL NaCl | 0%         | 50%    |
| 20 mg/mL HEWL, 60 mg/mL NaCl | 5%         | 10%    |
| 30 mg/mL HEWL, 30 mg/mL NaCl | 40%        | 13.33% |
| 30 mg/mL HEWL, 40 mg/mL NaCl | 5%         | 56.67% |
| 30 mg/mL HEWL, 50 mg/mL NaCl | 0%         | 36.67% |
| 30 mg/mL HEWL, 60 mg/mL NaCl | 0%         | 0%     |
| 40 mg/mL HEWL, 30 mg/mL NaCl | 0%         | 6.67%  |
| 40 mg/mL HEWL, 40 mg/mL NaCl | 0%         | 40%    |
| 40 mg/mL HEWL, 50 mg/mL NaCl | 0%         | 10%    |
| 40 mg/mL HEWL, 60 mg/mL NaCl | 0%         | 0%     |

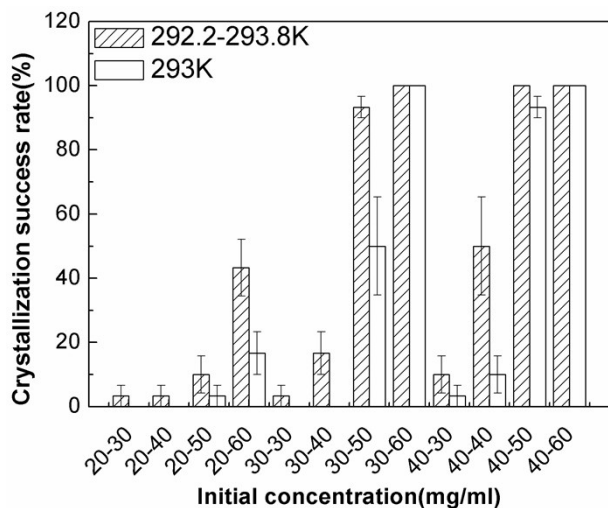

(a)

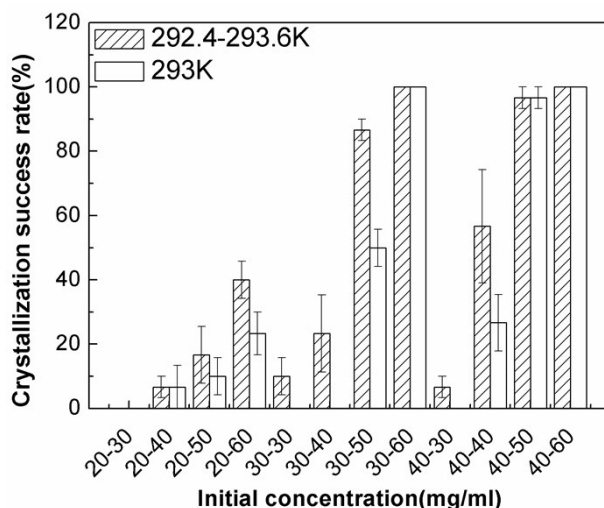

(b)

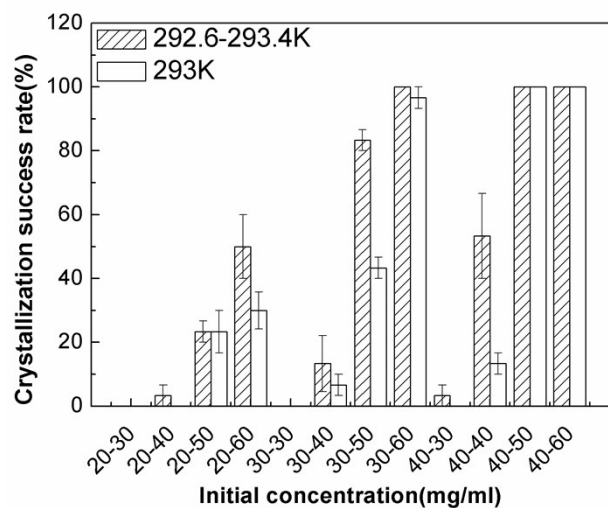

(c)

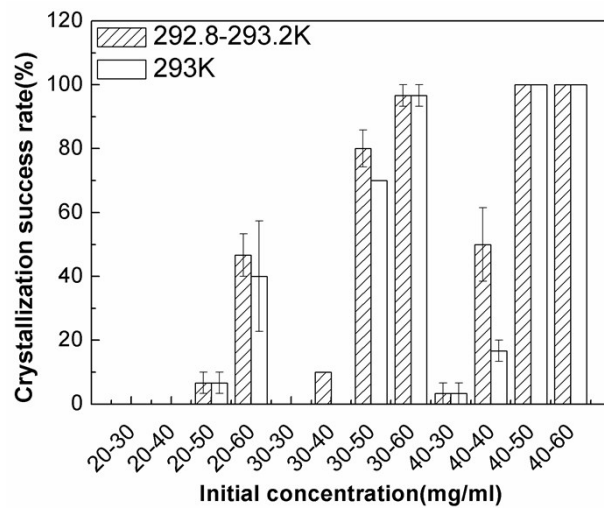

(d)

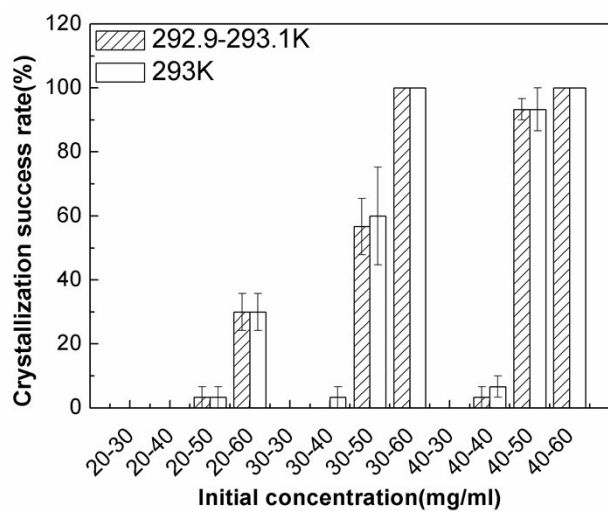

(e)

**Fig. S2.** The crystallization success rate of lysozyme at varying temperature and the constant temperature. (a) Varying temperature: 292.2-293.8 K, Constant temperature: 293 K; (b) Varying temperature: 292.4-293.6 K,

constant temperature: 293 K; (c) Varying temperature: 292.6-293.4 K, constant temperature: 293 K; (d) Varying temperature: 292.8-293.2 K, constant temperature: 293 K; (e) Varying temperature: 292.9-293.1 K, constant temperature: 293 K. 20-30: initial concentration of 20 mg/mL for lysozyme and 30 mg/mL for NaCl; 20-40: initial concentration of 20 mg/mL for lysozyme and 40 mg/mL for NaCl; 20-50: initial concentration of 20 mg/mL for lysozyme and 50 mg/mL for NaCl; 20-60: initial concentration of 20 mg/mL for lysozyme and 60 mg/mL for NaCl; 30-30: initial concentration of 30mg/mL for lysozyme and 30 mg/mL for NaCl; 30-40: initial concentration of 30 mg/mL for lysozyme and 40 mg/mL for NaCl; 30-50: initial concentration of 30 mg/mL for lysozyme and 50 mg/mL for NaCl; 30-60: initial concentration of 30 mg/mL for lysozyme and 60 mg/mL for NaCl; 40-30: initial concentration of 40 mg/mL for lysozyme and 30 mg/mL for NaCl; 40-40: initial concentration of 40 mg/mL for lysozyme and 40 mg/mL for NaCl; 40-50: initial concentration of 40 mg/mL for lysozyme and 50 mg/mL for NaCl; 40-60: initial concentration of 40 mg/mL for lysozyme and 60 mg/mL for NaCl.

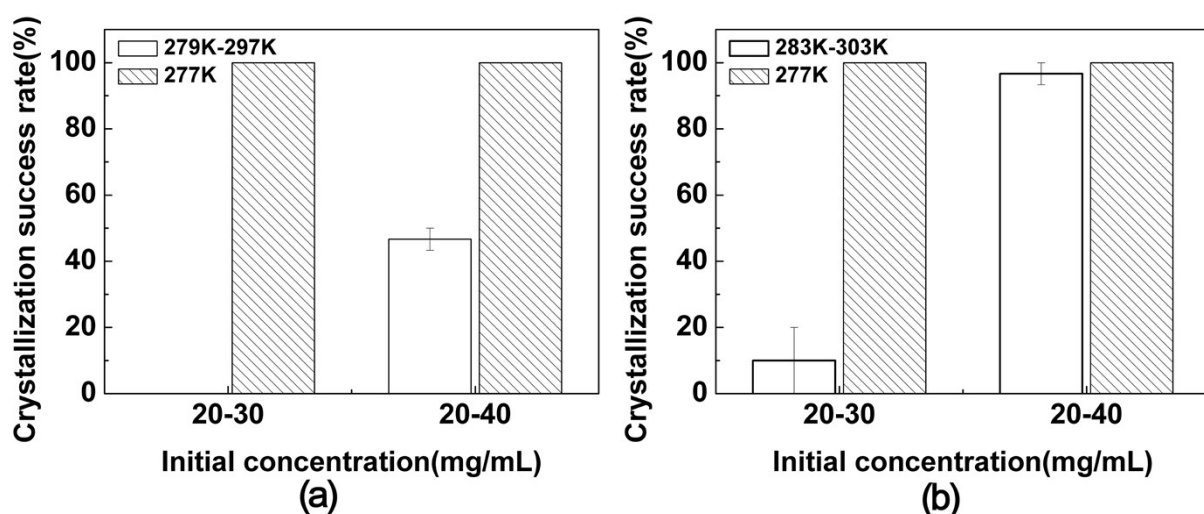

**Fig. S3.** The lysozyme crystallization success rate at varying temperature and constant temperature. (a) The temperature ranged from 279 K to 297 K; (b) The temperature ranged from 283 K to 303 K. 20-30: initial concentrations: HEWL 20 mg/mL, NaCl 30 mg/mL; 20-40: initial concentrations: HEWL 20 mg/mL, NaCl 30 mg/mL.

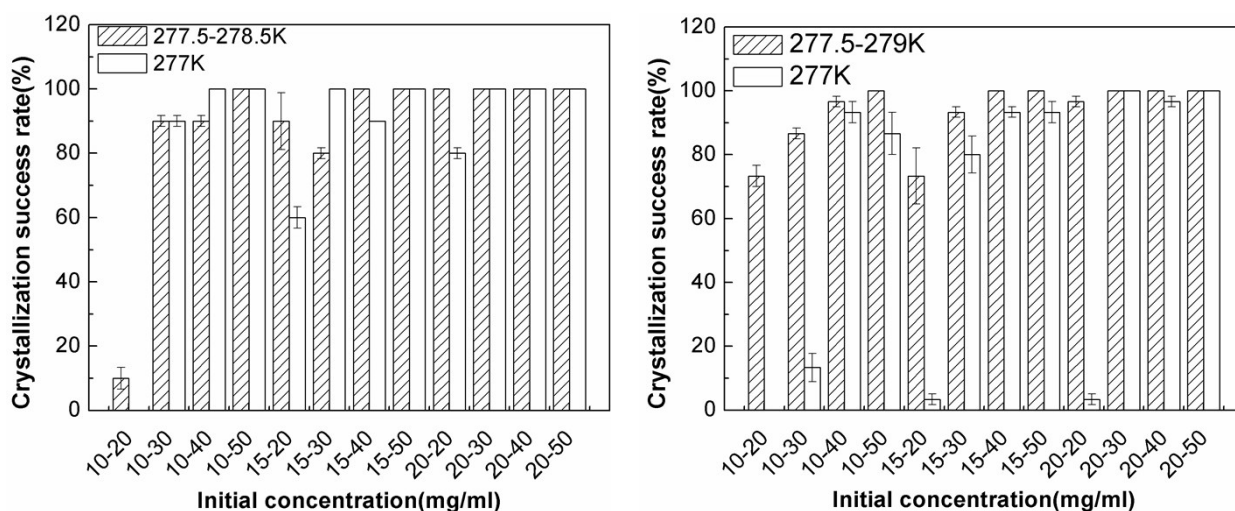

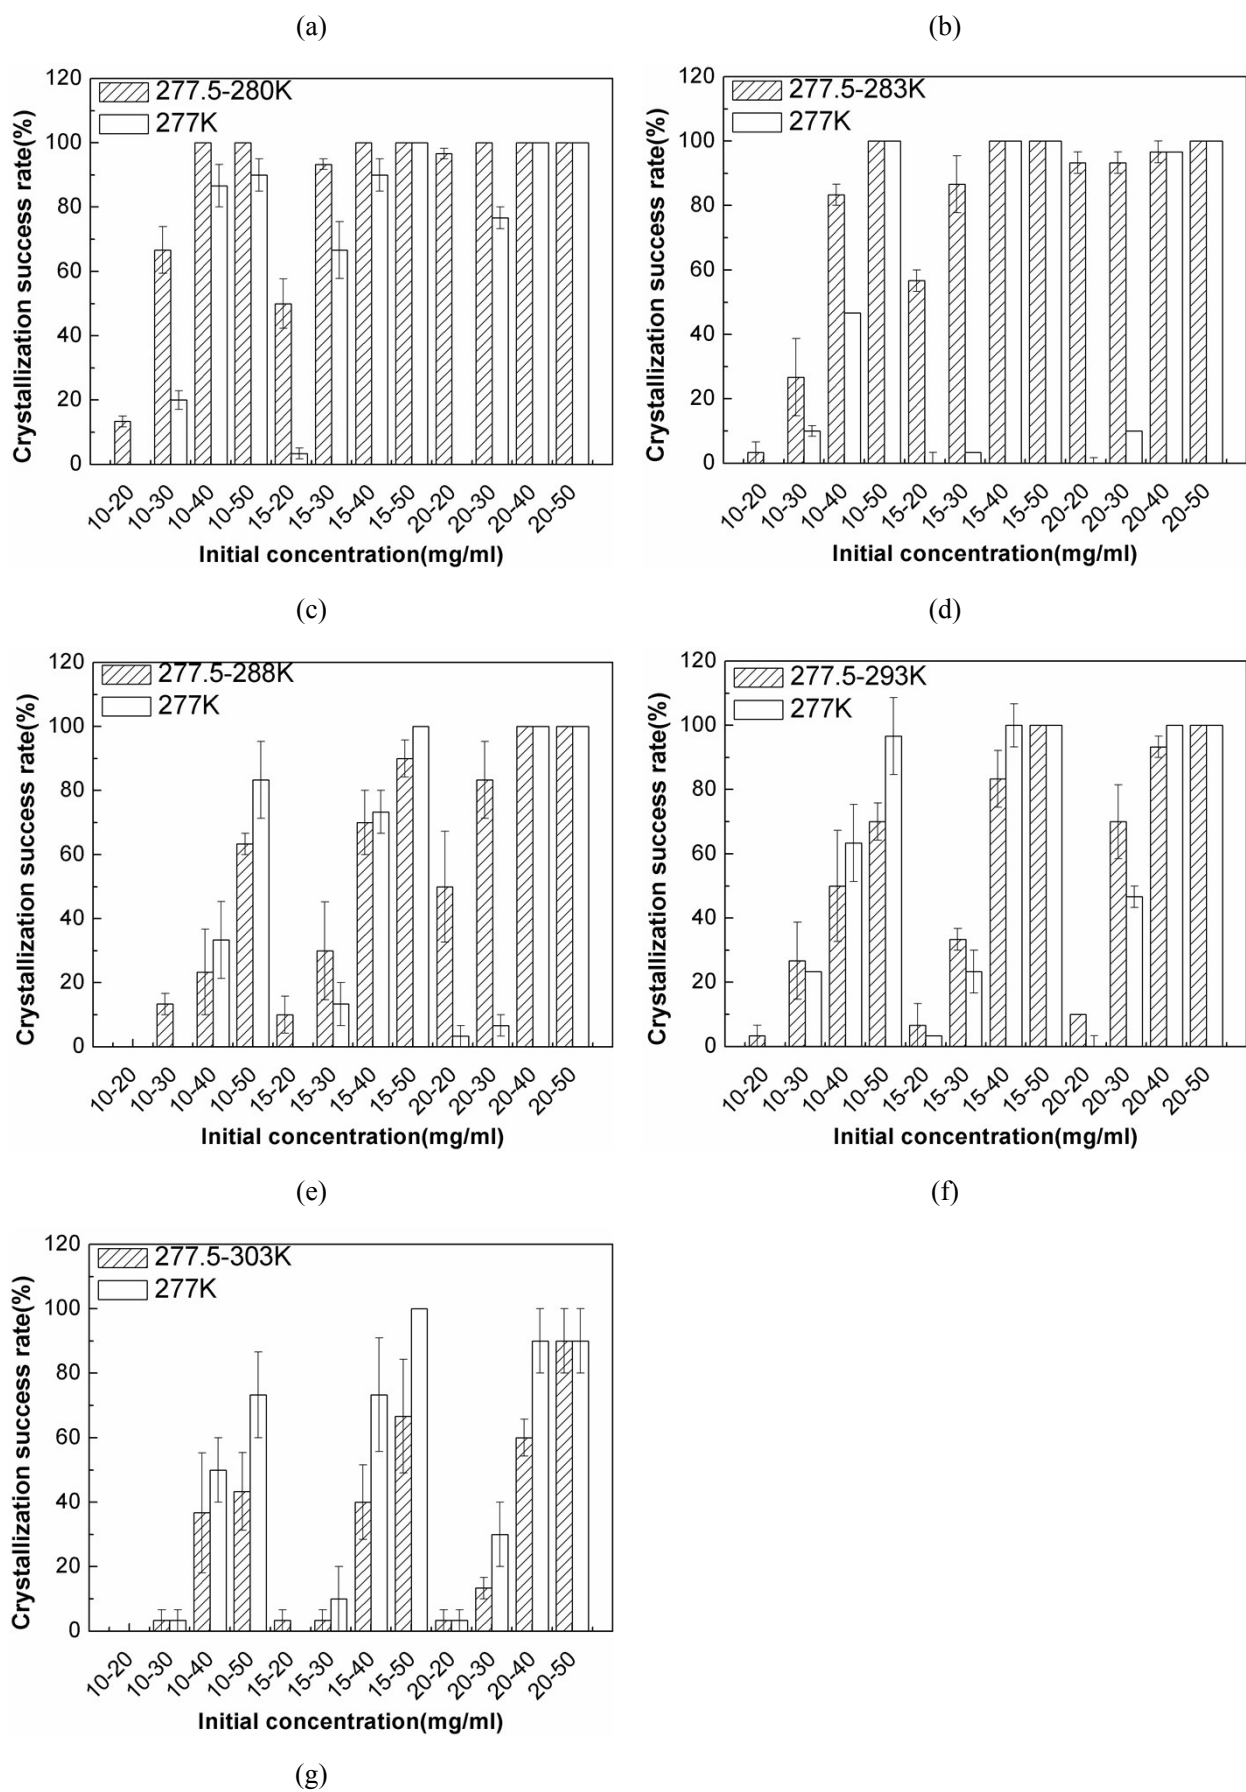

**Fig. S4.** The crystallization success rate of lysozyme at varying temperature and the constant temperature. (a)

Varying temperature: 277.5-278.5 K, constant temperature: 277 K; (b) Varying temperature: 277.5-279 K, constant temperature: 277 K; (c) Varying temperature: 277.5-280 K, constant temperature: 277 K; (d) Varying temperature: 277.5-283 K, constant temperature: 277 K; (e) Varying temperature: 277.5-288 K, constant temperature: 277 K; (f) Varying temperature: 277.5-293 K, constant temperature: 277 K; (g) Varying temperature: 277.5-303 K, constant temperature: 277 K. 10-20: initial concentration of 10 mg/mL for lysozyme and 20 mg/mL for NaCl; 10-30: initial concentration of 10 mg/mL for lysozyme and 30 mg/mL for NaCl; 10-40: initial concentration of 10 mg/mL for lysozyme and 40 mg/mL for NaCl; 10-50: initial concentration of 10 mg/mL for lysozyme and 50 mg/mL for NaCl; 15-20: initial concentration of 15 mg/mL for lysozyme and 20 mg/mL for NaCl; 15-30: initial concentration of 15 mg/mL for lysozyme and 30 mg/mL for NaCl; 15-40: initial concentration of 15 mg/mL for lysozyme and 40 mg/mL for NaCl; 15-50: initial concentration of 15 mg/mL for lysozyme and 50 mg/mL for NaCl; 20-20: initial concentration of 20 mg/mL for lysozyme and 20 mg/mL for NaCl; 20-30: initial concentration of 20 mg/mL for lysozyme and 30 mg/mL for NaCl; 20-40: initial concentration of 20 mg/mL for lysozyme and 40 mg/mL for NaCl; 20-50: initial concentration of 20 mg/mL for lysozyme and 50 mg/mL for NaCl.
